# Supplementary material
Source: Springer Nature journal article supplement (https://www.springermedizin.de/resource/supplementary/12874_2008_336_MOESM1_ESM.pdf/9434256)
Supplement: MOESM1 [file 9434256]

$$p = 1/(1 + e^{-x})$$

where  $x = -13.415 + 0.028(\text{age}) + 0.661(\text{sex}) + 0.412(\text{MA}) + 0.079(\text{FG}) + 0.018(\text{SBP}) - 0.039(\text{HDL}) + 0.070(\text{BMI}) + 0.481(\text{family history})$

- $p$  = probability of developing diabetes over the 7.5 year follow-up period
- age is in years
- sex = 1 if female, 0 if male
- MA = 1 if Mexican American (*LLDPP using Hispanic*), 0 if non-Hispanic white
- FG = fasting glucose in mg/dL
- SBP = systolic blood pressure in mm Hg
- HDL = high-density lipoprotein cholesterol level in mg/dL
- BMI = body mass index in kg/m<sup>2</sup>
- family history = 1 if at least one parent or sibling has diabetes or 0 if not
